# Supplementary material for: The Interdecadal Pacific Oscillation is responsible for the linkage of decadal changes in precipitation and moisture in arid central Asia and the humid Asian monsoon region during the last millennium
Source: Copernicus journal article supplement (doi:10.5194/cp-20-107-2024), 2024-01-15
Supplement: Supplementary file 1 [file cp-20-107-2024-supplement.pdf]

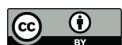

## *Supplement of*

# **The Interdecadal Pacific Oscillation is responsible for the linkage of decadal changes in precipitation and moisture in arid central Asia and the humid Asian monsoon region during the last millennium**

**Hongna Xu et al.**

*Correspondence to:* Tao Wang (wangtao@mail.iap.ac.cn)

The copyright of individual parts of the supplement might differ from the article licence.

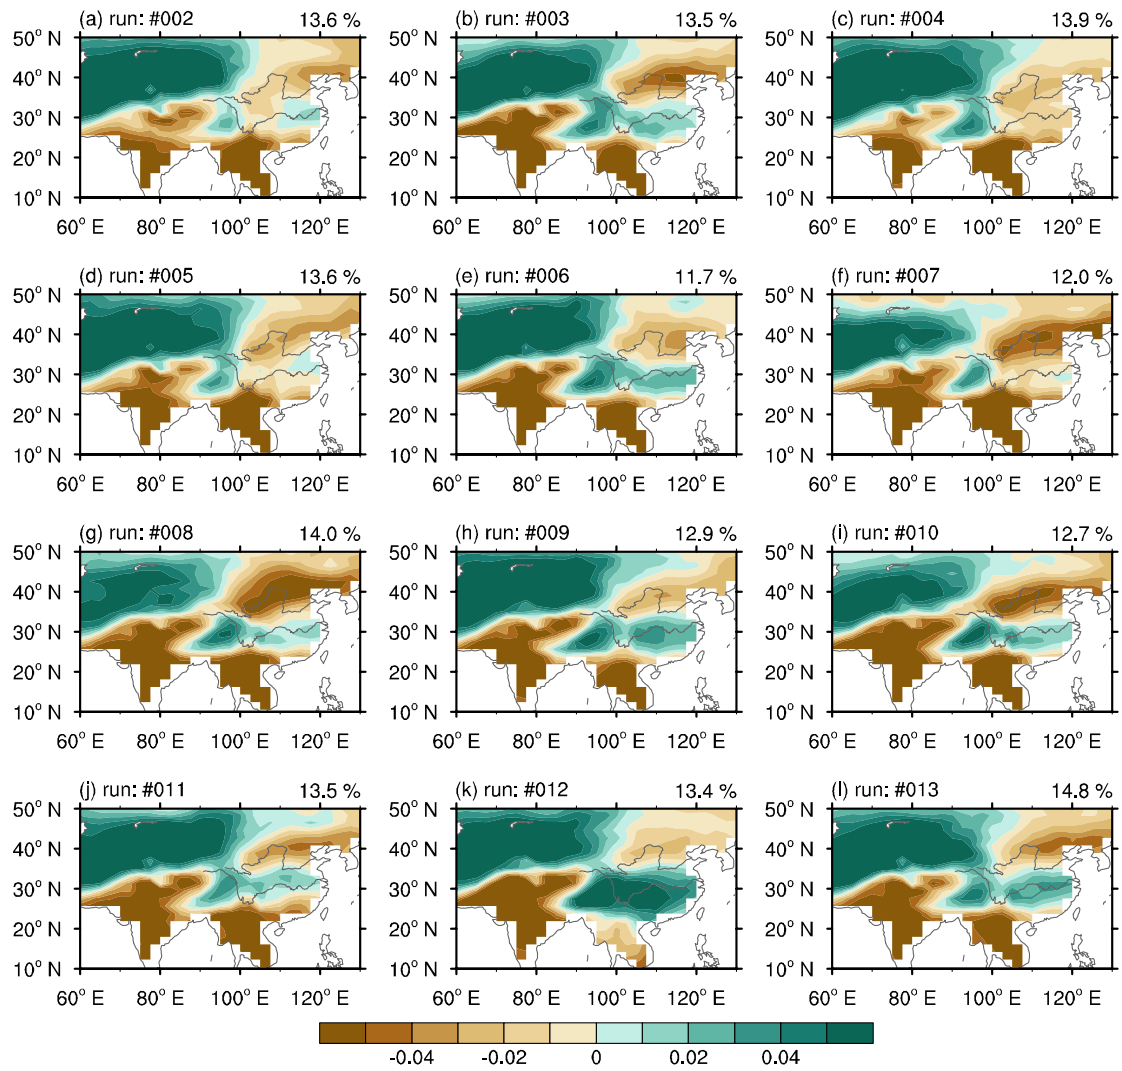

**Figure S1.** The simulated first leading precipitation mode. (a–l) EOF1 of the nine-year low-pass Lanczos filtered annual precipitation in the CESM-LME 12 all-forcing simulations for the time period 850–2005. The explained variances are given at the top-right.

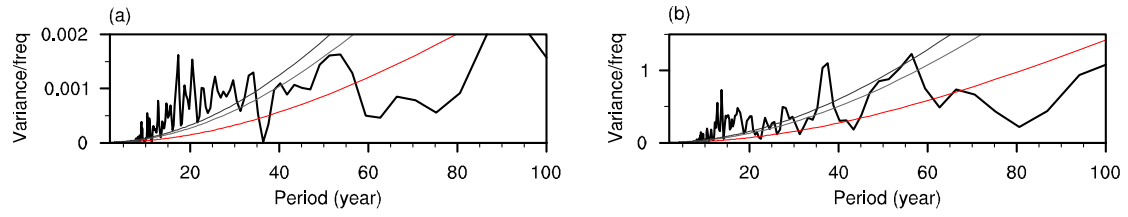

**Figure S2.** (a) Power spectrum of the time series of the leading decadal precipitation mode (black line) and (b) power spectrum of the time series of the IPO index (black line) in the Last Millennium Reanalysis dataset. The dark (light) gray line indicates the confidence curve at the 95% (90%) confidence level and the red line shows the Markov red noise spectrum.

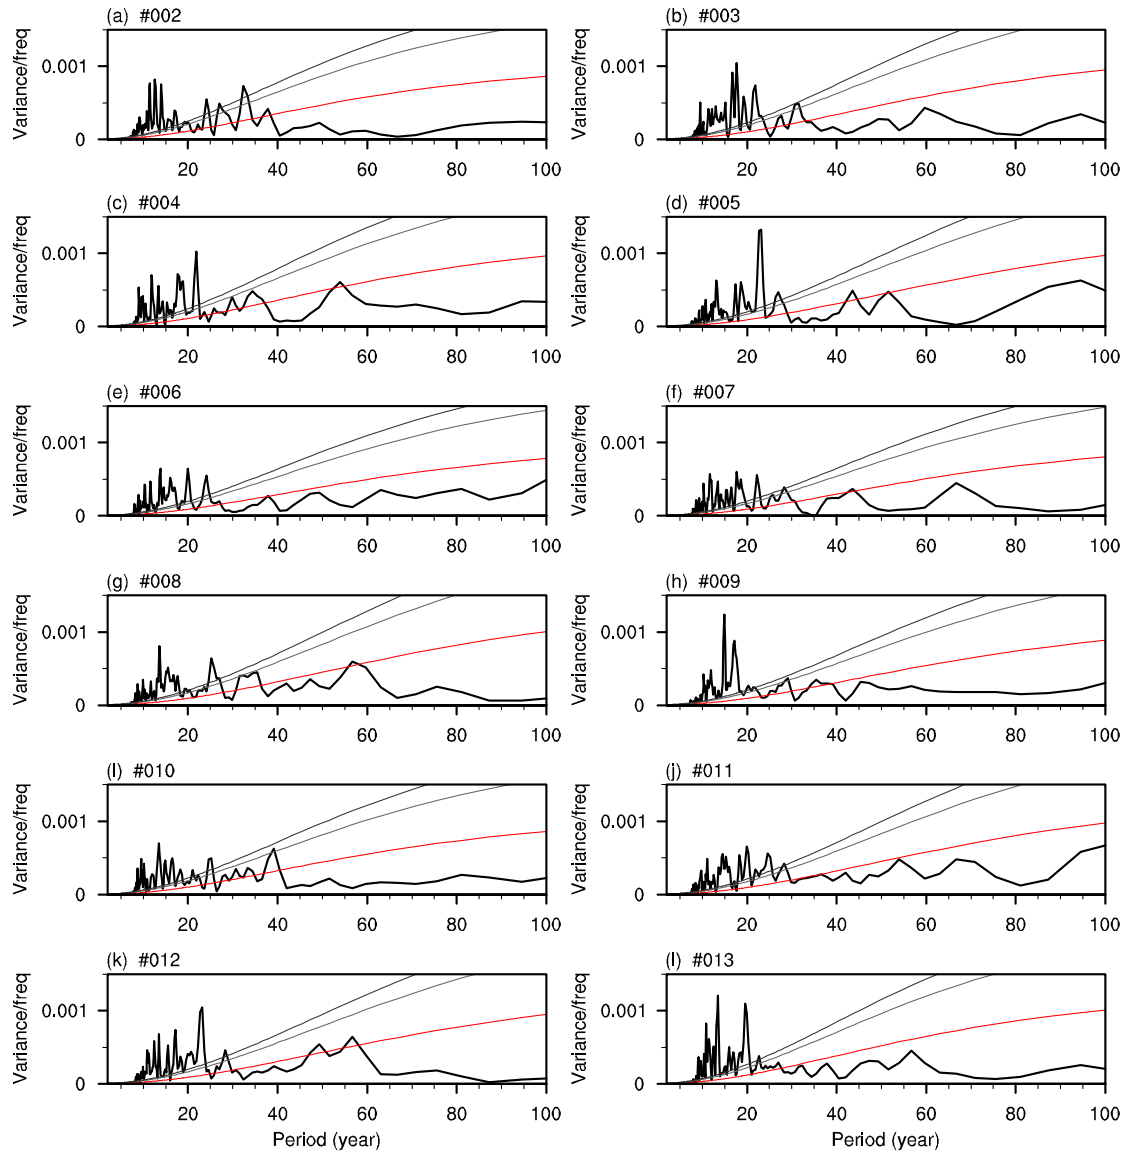

**Figure S3.** Power spectrum of the time series of the leading decadal precipitation mode (black lines) in the CESM-LME 12 all-forcing simulations. The dark (light) gray lines indicate the confidence curve at the 95% (90%) confidence level and the red lines show the Markov red noise spectrum.

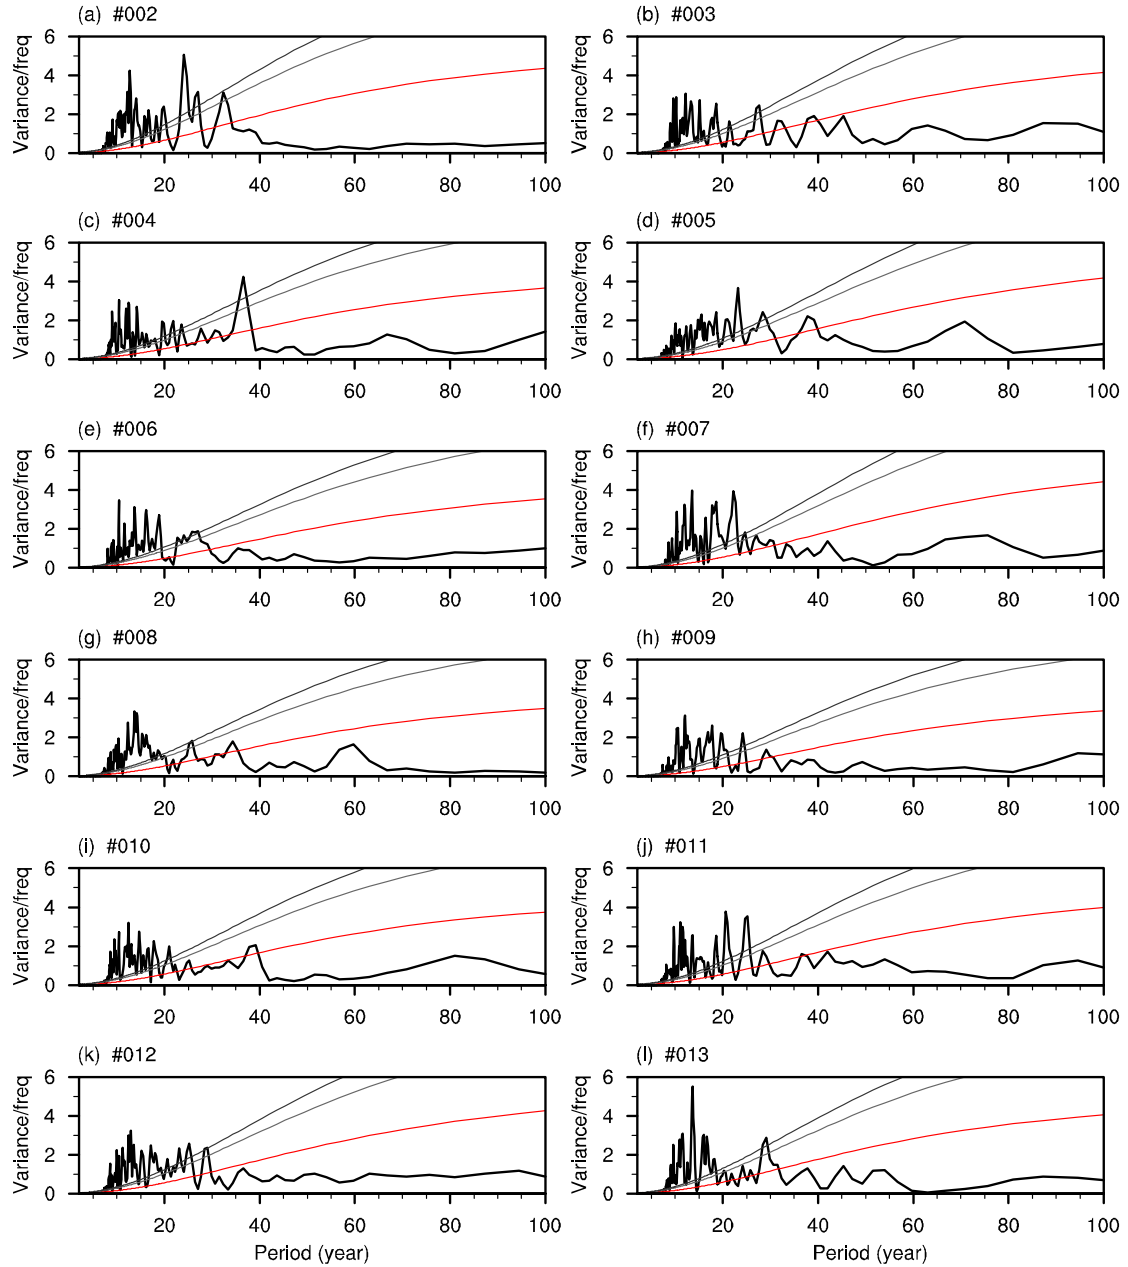

**Figure S4.** Power spectrum of the time series of the IPO index (black lines) in the CESM-LME 12 all-forcing simulations. The dark (light) gray lines indicate the confidence curve at the 95% (90%) confidence level and the red lines show the Markov red noise spectrum.

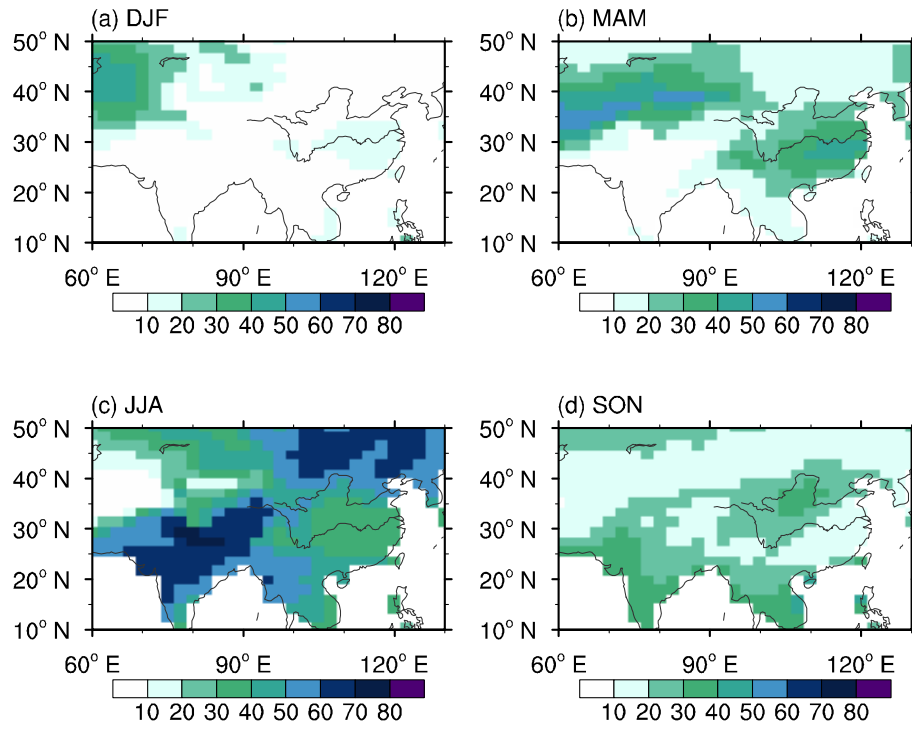

**Figure S5.** Average values of the percentage of the annual precipitation accounted for by (a) winter, (b) spring, (c) summer and (d) autumn precipitation in the CESM-LME all-forcing simulations.

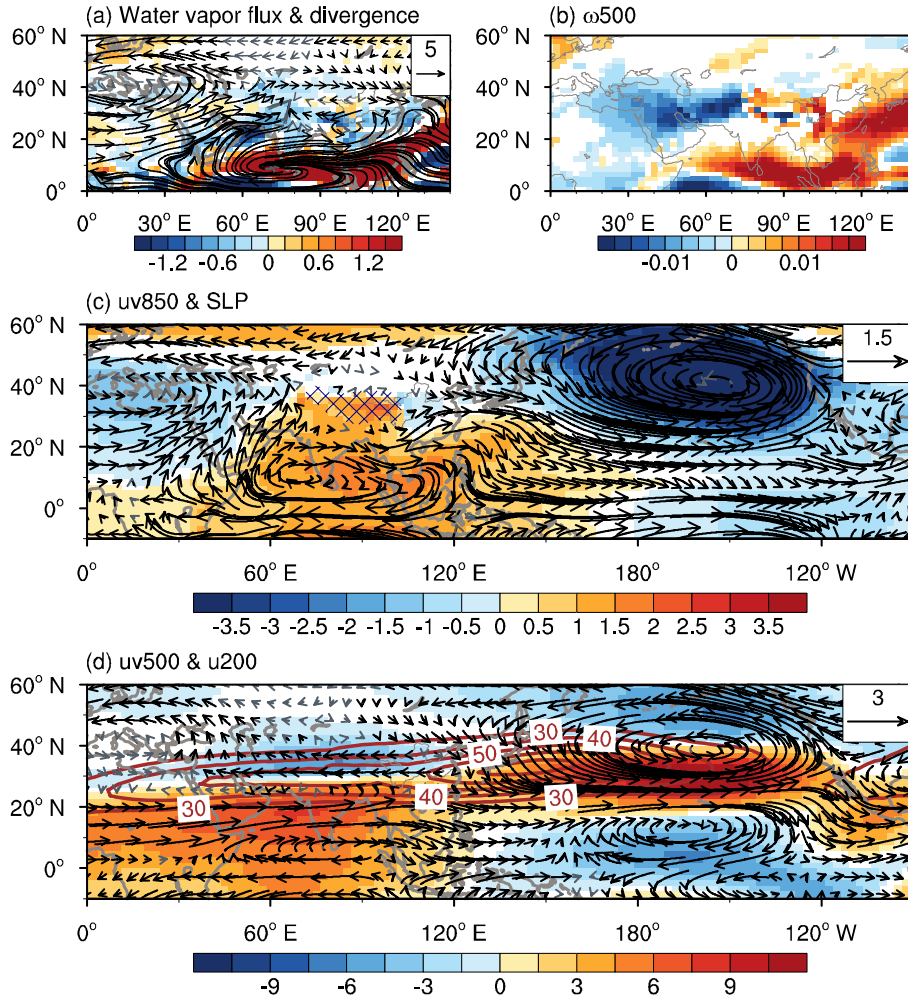

**Figure S6.** Simulated winter atmospheric circulation anomalies during the positive phases of the IPO. Regressed maps of anomalous (a) vertically integrated water vapor flux from 1000 to 300 hPa (vectors; units:  $\text{kg m}^{-1} \text{s}^{-1}$ ) and its divergence (shading; units:  $10^{-5} \text{kg m}^{-2} \text{s}^{-1}$ ), (b) 500 hPa vertical velocity ( $\omega_{500}$ ) (units:  $\text{Pa s}^{-1}$ ), (c) 850 hPa wind (uv850) (vectors; units:  $\text{m s}^{-1}$ ) and SLP (shading; units: hPa), (d) 500 hPa wind (uv500) (vectors; units:  $\text{m s}^{-1}$ ) and 200 hPa zonal wind (u200) (shading; units:  $\text{m s}^{-1}$ ) onto the time series of the IPO index simulated by the CESM-LME all-forcing runs. The blue hatched patterns in part (c) indicate the region with an altitude  $>3000$  m. The brown contours in part (d) are the climatological 200 hPa zonal wind (units:  $\text{m s}^{-1}$ ). The shading shows that at least two-thirds of the members simulate significant changes (at the 95% significance level), and these significant changes agree on the sign of the average of multiple members. The black vectors show that for the zonal or meridional component, at least two-thirds of the members simulate significant changes (at the 95% significance level), and these significant changes agree on the sign of the average.

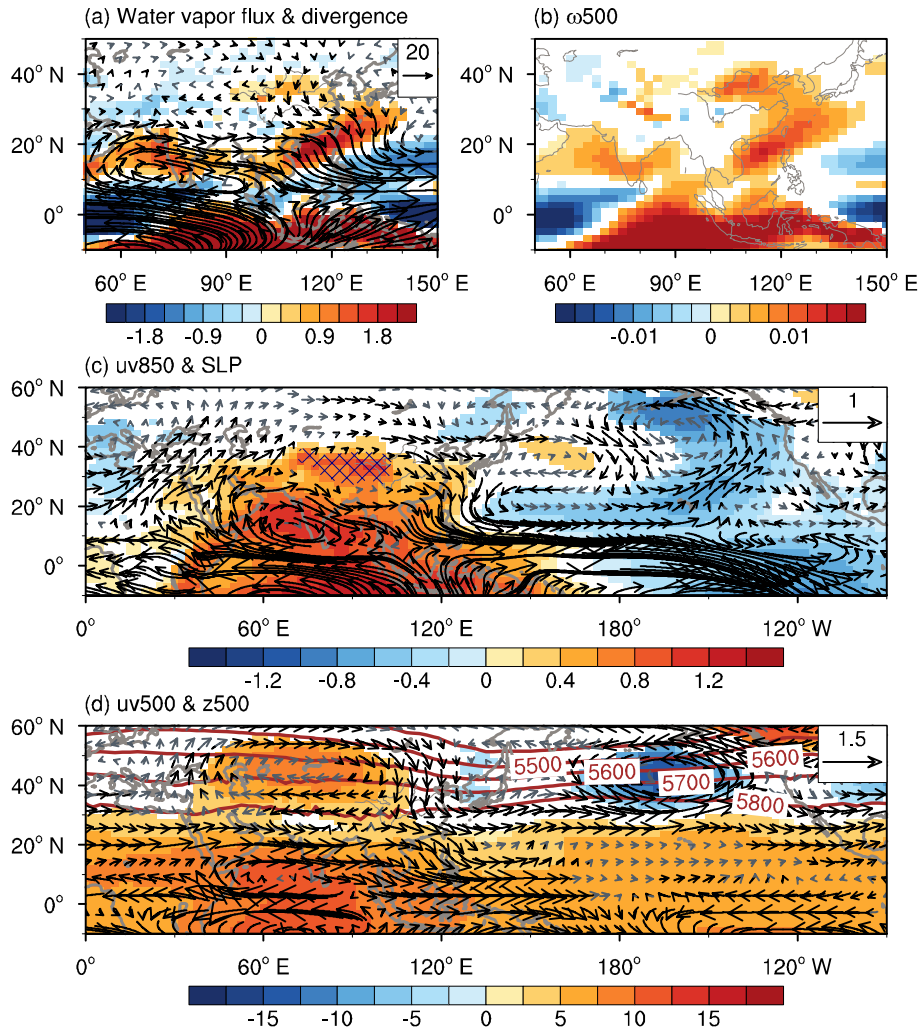

**Figure S7.** Simulated autumn atmospheric circulation anomalies during the positive phases of the IPO. Regressed maps of anomalous (a) vertically integrated water vapor flux from 1000 to 300 hPa (vectors; units:  $\text{kg m}^{-1} \text{s}^{-1}$ ) and its divergence (shading; units:  $10^{-5} \text{kg m}^{-2} \text{s}^{-1}$ ), (b) 500 hPa vertical velocity ( $\omega_{500}$ ) (units:  $\text{Pa s}^{-1}$ ), (c) 850 hPa wind (uv850) (vectors; units:  $\text{m s}^{-1}$ ) and SLP (shading; units: hPa), and (d) 500 hPa wind (uv500) (vectors; units:  $\text{m s}^{-1}$ ) and 500 hPa geopotential height (z500) (shading; units: m) onto the time series of the IPO index simulated by the CESM-LME all-forcing runs. The blue hatched patterns in part (c) indicate the region with an altitude  $>3000$  m. The brown contours in part (d) are the climatological 500 hPa geopotential height (units: m). The shading shows that at least two-thirds of the members simulate significant changes (at the 95% significance level), and these significant changes agree on the sign of the average of multiple members. The black vectors show that for the zonal or meridional component, at least two-thirds of the members simulate significant changes (at the 95% significance level), and these significant changes agree on the sign of the average.

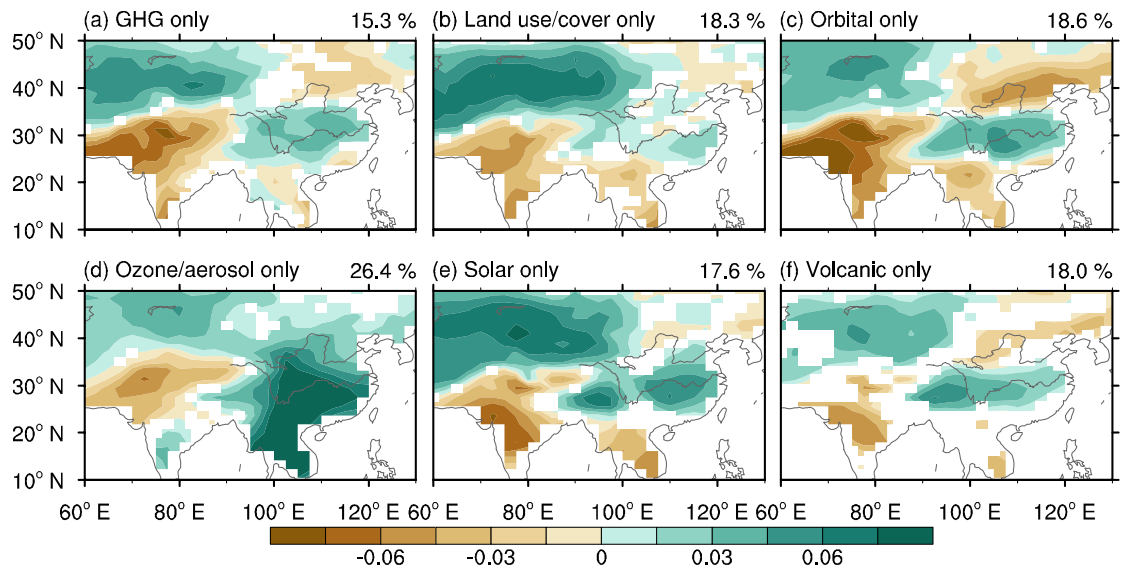

**Figure S8.** The leading decadal precipitation mode for the time period 1850–2005 in the single-forcing simulations. (a–f) The average EOF1 of the nine-year low-pass Lanczos filtered annual precipitation in six subsets of the single-forcing simulations. The averaged explained variance is given at the top-right. The shading shows where at least two-thirds of the members agree on the sign of the average of multiple members.

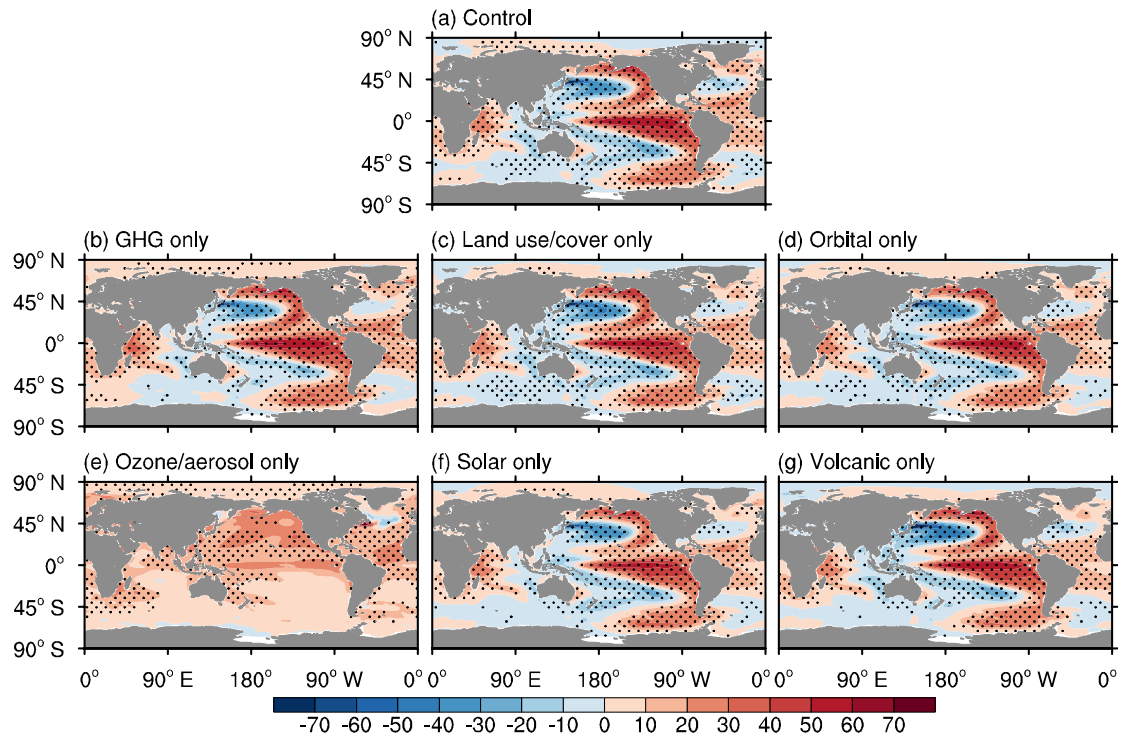

**Figure S9.** The SST anomalies (units: °C) regressed onto the time series of the leading decadal precipitation mode in the (a) control simulation and (b–g) six subsets of the single-forcing simulations. The dots in part (a) show significant anomalies at the 95% confidence level and the dots in parts (b–g) denote that at least two-thirds of the members simulate significant changes (at the 95% significance level), and these significant changes agree on the sign of the average of multiple members.

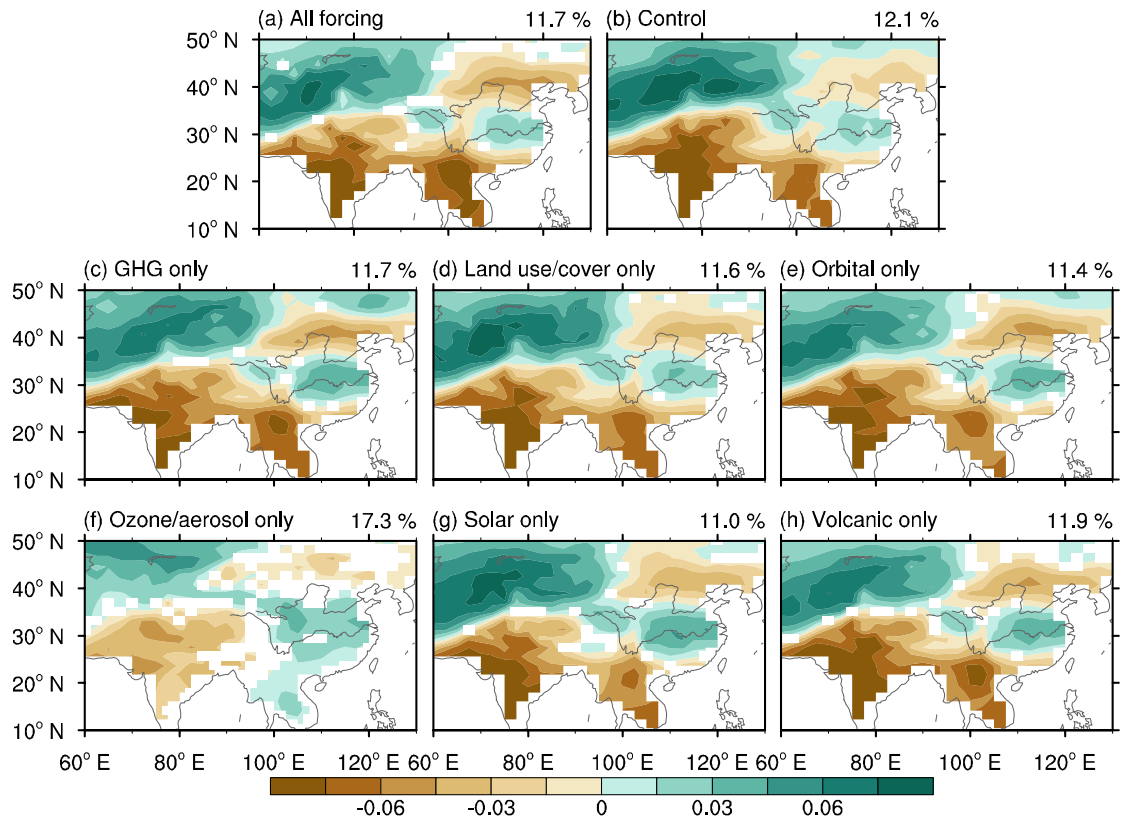

**Figure S10.** The simulated leading decadal soil moisture mode for the time period 850–2005 in all the experiments, with the exception of leading mode for the time period 1850–2005 in experiment forced by ozone and aerosols. **(a)** The average EOF1 of the nine-year low-pass Lanczos filtered soil moisture content (top 10 cm of soil) in the all-forcing simulations. The averaged explained variance is given at the top-right. **(b)** EOF1 of the nine-year low-pass Lanczos filtered soil moisture content in the control simulation. The explained variance is given at the top-right. **(c–h)** The average EOF1 of the nine-year low-pass Lanczos filtered soil moisture content in six subsets of the single-forcing simulations. The averaged explained variance is given at the top-right. The shading in parts **(a, c–h)** shows where at least two-thirds of the members agree on the sign of the average of multiple members.

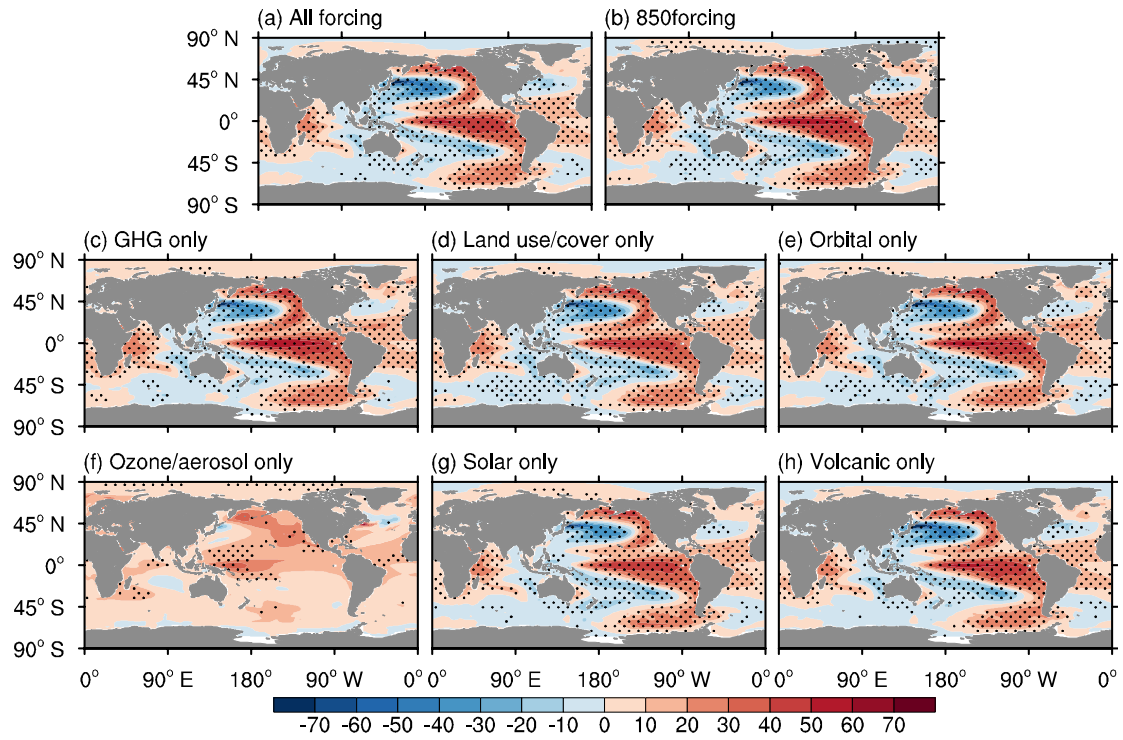

**Figure S11.** The SST anomalies (units: °C) regressed onto the time series of the leading decadal aridity index mode in the (a) all-forcing simulations, (b) control simulation, and (c–h) six subsets of the single-forcing simulations. The dots in part (b) show significant anomalies at the 95% confidence level and the dots in parts (a, c–h) denote that at least two-thirds of the members simulate significant changes (at the 95% significance level), and these significant changes agree on the sign of the average of multiple members.

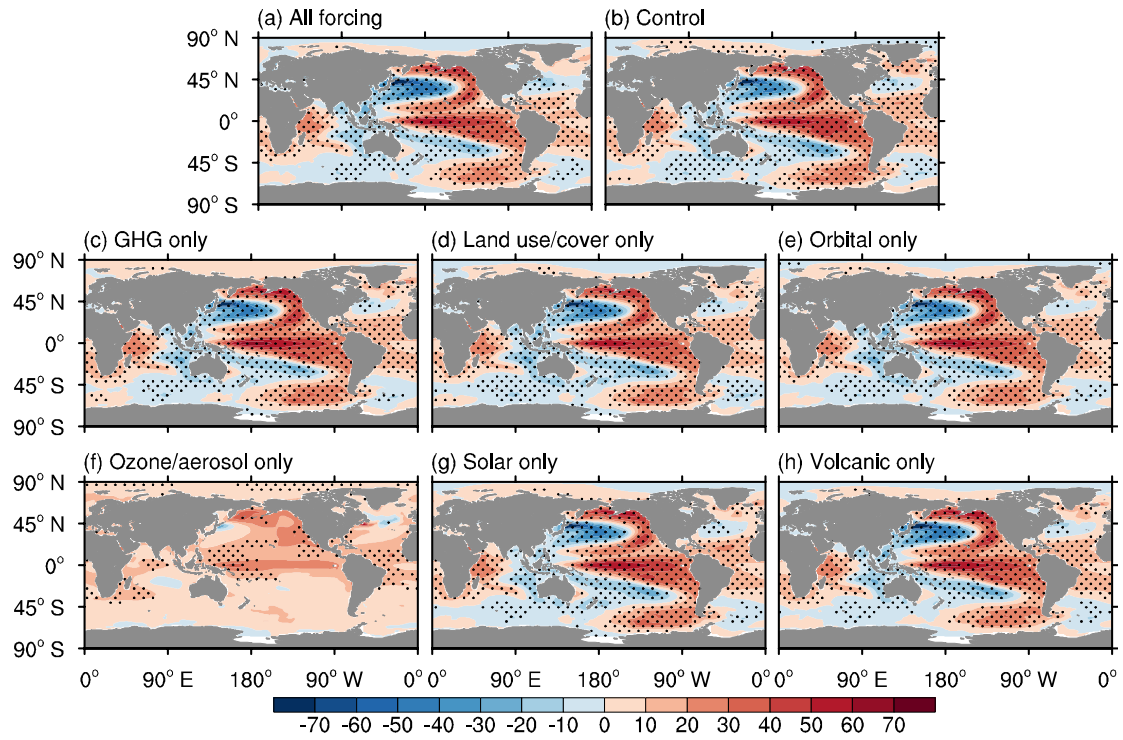

**Figure S12.** The SST anomalies (units: °C) regressed onto the time series of the leading decadal soil moisture mode in the (a) all-forcing simulations, (b) control simulation, and (c–h) six subsets of the single-forcing simulations. The dots in part (b) show significant anomalies at the 95% confidence level and the dots in parts (a, c–h) denote that at least two-thirds of the members simulate significant changes (at the 95% significance level), and these significant changes agree on the sign of the average of multiple members.

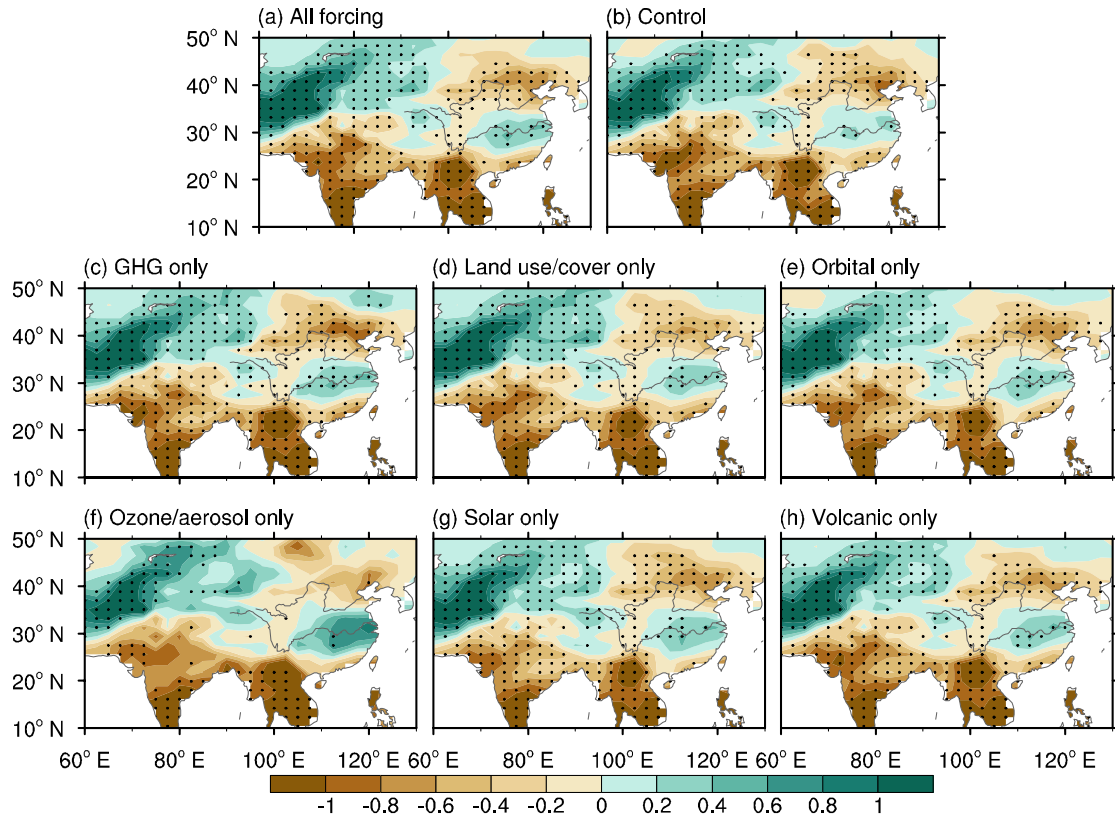

**Figure S13.** Simulated soil moisture anomalies during the positive phases of the IPO. The soil moisture anomalies (units:  $\text{kg m}^{-2}$ ) regressed onto the time series of the IPO index in the (a) all-forcing simulations, (b) control simulation, and (c–h) six subsets of the single-forcing simulations. The dots in part (b) show significant anomalies at the 95% confidence level and the dots in parts (a, c–h) denote that at least two-thirds of the members simulate significant changes (at the 95% significance level), and these significant changes agree on the sign of the average of multiple members.

**Tabel S1.** The correlations across the time series of the leading decadal precipitation mode simulated by CESM-LME 12 all-forcing simulations.

| Cor  | #002  | #003 | #004  | #005  | #006  | #007  | #008  | #009 | #010 | #011 | #012 | #013 |
|------|-------|------|-------|-------|-------|-------|-------|------|------|------|------|------|
| #002 | 1.00  | —    | —     | —     | —     | —     | —     | —    | —    | —    | —    | —    |
| #003 | 0.10  | 1.00 | —     | —     | —     | —     | —     | —    | —    | —    | —    | —    |
| #004 | 0.14  | 0.15 | 1.00  | —     | —     | —     | —     | —    | —    | —    | —    | —    |
| #005 | 0.17  | 0.17 | 0.19  | 1.00  | —     | —     | —     | —    | —    | —    | —    | —    |
| #006 | 0.16  | 0.14 | 0.16  | 0.11  | 1.00  | —     | —     | —    | —    | —    | —    | —    |
| #007 | 0.16  | 0.17 | 0.20  | 0.21  | 0.19  | 1.00  | —     | —    | —    | —    | —    | —    |
| #008 | 0.20  | 0.19 | 0.26* | 0.24* | 0.18  | 0.25* | 1.00  | —    | —    | —    | —    | —    |
| #009 | 0.12  | 0.14 | 0.15  | 0.11  | 0.08  | 0.12  | 0.22* | 1.00 | —    | —    | —    | —    |
| #010 | 0.16  | 0.19 | 0.26* | 0.23* | 0.12  | 0.31* | 0.35* | 0.08 | 1.00 | —    | —    | —    |
| #011 | 0.03  | 0.19 | 0.24* | 0.16  | 0.16  | 0.12  | 0.17  | 0.10 | 0.16 | 1.00 | —    | —    |
| #012 | -0.06 | 0.04 | 0.01  | 0.02  | -0.06 | -0.02 | -0.02 | 0.05 | 0.04 | 0.04 | 1.00 | —    |
| #013 | 0.09  | 0.08 | 0.15  | 0.20  | 0.05  | 0.16  | 0.11  | 0.03 | 0.14 | 0.09 | 0.07 | 1.00 |

\* denotes significant correlation at the 95% confidence level, except for autocorrelations.
